# Supplementary material for: Ionic Mechanisms of Disopyramide Prolonging Action Potential Duration in Human-Induced Pluripotent Stem Cell-Derived Cardiomyocytes From a Patient With Short QT Syndrome Type 1
Source: PubMed Central journal article supplement (PMC7586889; doi:10.3389/fphar.2020.554422), 2020-10-12

## Supplementary information

### Ionic mechanisms of disopyramide prolonging action potential duration in human-induced pluripotent stem cell-derived cardiomyocytes from a patient with short QT syndrome type 1

#### Running title: Lan et al, disopyramide effects in SQTs1-hiPSC-CMs

Huan Lan<sup>1\*</sup>, Qiang Xu<sup>2,5\*</sup>, Ibrahim El-Battrawy<sup>2,3</sup>, Rujia Zhong<sup>2</sup>, Xin Li<sup>2</sup>, Siegfried Lang<sup>2,3</sup>, Lukas Cyganek<sup>4,3</sup>, Martin Borggrefe<sup>2,3</sup>, Xiaobo Zhou<sup>2,3,1</sup>, Ibrahim Akin<sup>2,3</sup>

<sup>1</sup>Key Laboratory of Medical Electrophysiology of Ministry of Education and Medical Electrophysiological Key Laboratory of Sichuan Province, Institute of Cardiovascular Research, Southwest Medical University, Luzhou, China. <sup>2</sup>First Department of Medicine, Faculty of Medicine, University Medical Centre Mannheim (UMM), University of Heidelberg, Mannheim, Germany; <sup>3</sup>DZHK (German Center for Cardiovascular Research), Partner Sites, Heidelberg-Mannheim and Göttingen, Germany; <sup>4</sup>Stem Cell Unit, Clinic for Cardiology and Pneumology, University Medical Center Göttingen, Göttingen, Germany; <sup>5</sup>Department of Histology and Embryology, Southwest Medical University, Luzhou, China.

\*equally contributed.

#### Address for correspondence:

Xiaobo Zhou, MD

First Department of Medicine, Faculty of Medicine, University Medical Centre Mannheim, University of Heidelberg, Theodor-Kutzer-Ufer 1-3, 68167 Mannheim, Germany. **E-mail:** [Xiaobo.zhou@medma.uni-heidelberg.de](mailto:Xiaobo.zhou@medma.uni-heidelberg.de)

#### Funding:

This study was supported by the German Center for Cardiovascular Research (DZHK) (81Z0500204) and National Natural Science Foundation of China (No. 31300947).

**Conflict of Interest:** *The authors declare that the research was conducted in the absence of any commercial or financial relationships that could be construed as a potential conflict of interest.*

**Supplemental Table 1. Comparison of effects of disopyramide in healthy and SQTs-cells**

|          | Healthy cells                      | SQTs cells |
|----------|------------------------------------|------------|
| APD      | prolonged                          | prolonged  |
| Vmax     | reduced                            | reduced    |
| Peak INa | reduced                            | reduced    |
| Late INa | Reduced <sup>1-2</sup> , increased | increased  |
| ICa-L    | reduced                            | increased  |
| Ito      | Reduced <sup>3</sup>               | NA         |
| IKr      | reduced                            | No effect  |
| IKs      | Reduced <sup>4</sup>               | No effect  |
| IK1      | Increased <sup>5</sup>             | NA         |
| IKATP    | Reduced <sup>6-7</sup>             | No effect  |
| ISK      | No effect <sup>8</sup> , reduced   | reduced    |
| INCX     | increased                          | increased  |

NA: not analyzed

1. Wang et al. Persistent human cardiac Na<sup>+</sup> currents in stably transfected mammalian cells. *Channels (Austin)*. Jul-Aug 2013;7(4):263-74. doi: 10.4161/chan.25056
2. S Koumi, R Sato, I Hisatome, H Hayakawa, H Okumura, R Katori. Disopyramide Block of Cardiac Sodium Current After Removal of the Fast Inactivation Process in Guinea Pig Ventricular Myocytes. *J Pharmacol Exp Ther*. 1992 Jun;261(3):1167-74.
3. Virag, L., Varro, A., and Papp, J.G., Effect of disopyramide on potassium currents in rabbit ventricular myocytes. *Naunyn-Schmiedeberg's archives of pharmacology* 357 (1998) 268-75.
4. Satoh H. Comparative Actions of Cibenzoline and Disopyramide on I(Kr) and I(Ks) Currents in Rat Sino-Atrial Nodal Cells. *Eur J Pharmacol* . 2000 Oct 27;407(1-2):123-9. doi: 10.1016/s0014-2999(00)00734-2.
5. Martin et al. Effects of Disopyramide and Flecainide on the Kinetics of Inward Rectifier Potassium Channels in Rabbit Heart Muscle. *Br J Pharmacol* 1994 Mar;111(3):873-9. doi: 10.1111/j.1476-5381.1994.tb14819.x.
6. Horie, M., Hayashi, S., Yuzuki, Y., and Sasayama, S., Comparative studies of ATP sensitive potassium channels in heart and pancreatic beta cells using Vaughan-Williams class Ia antiarrhythmics. *Cardiovascular research* 26 (1992) 1087-94.

7. de Lorenzi, F.G., Bridal, T.R., and Spinelli, W., Voltage-dependent inhibition of the ATP-sensitive K<sup>+</sup> current by the class Ia agent disopyramide in cat ventricular myocytes. *The Journal of pharmacology and experimental therapeutics* 272 (1995) 714-23.
8. Rafel Simó-Vicens <sup>1</sup>, Daniel R P Sauter <sup>1</sup>, Morten Grunnet <sup>2</sup>, Jonas G Diness <sup>2</sup>, Bo H Bentzen. Effect of Antiarrhythmic Drugs on Small Conductance Calcium - Activated Potassium Channels. *Eur J Pharmacol* . 2017 May 15;803:118-123. doi: 10.1016/j.ejphar.2017.03.039. Epub 2017 Mar 18.

## Figure legends

**Figure S1. Effects of disopyramide on action potentials in hiPSC-CMs from a healthy donor.** Action potentials were recorded at 1 Hz. Disopyramide (10  $\mu$ M) was applied to cells. (A) Representative action potential traces in absence (Ctr) and presence of 10  $\mu$ M disopyramide. (B) Averaged values of action potential duration at 50% repolarization (APD<sub>50</sub>). (C) Averaged values of action potential duration at 90% repolarization (APD<sub>90</sub>). (D) Averaged values of resting potential (RP). (E) Averaged values of action potential amplitude (APA). (F) Averaged values of maximal depolarization velocity (V<sub>max</sub>). Shown are mean  $\pm$  SEM, n represents number of cells. The statistical significance was examined by paired t-test.

**Figure S2. Effects of disopyramide on I<sub>Kr</sub> hiPSC-CMs from the healthy donor.** I<sub>Kr</sub> was measured as Cs<sup>+</sup> currents. (A) Representative traces of I<sub>Kr</sub> at +40 mV evoked by the indicated protocol (inset) in absence (Ctr) and presence of disopyramide (10  $\mu$ M). (B) Mean values of I<sub>Kr</sub> at +40 mV in absence (Ctr) and presence of disopyramide (10  $\mu$ M). n, number of cells. The statistical significance was examined by paired t-test.

**Figure S3. Effects of disopyramide on I<sub>SK</sub> in hiPSC-CMs from the healthy donor.** The currents (I<sub>SK</sub>) were evoked by the protocol indicated in A (inset). I<sub>SK</sub> was analyzed as apamin (100 nM) sensitive currents. (A) Representative traces of I<sub>SK</sub> at +40 mV in absence (Ctr) and presence of disopyramide (10  $\mu$ M). (B) I-V curves of I<sub>SK</sub> in absence

(Ctr) and presence of disopyramide. (C) Mean values of  $I_{SK}$  at +40 mV in absence (Ctr) and presence of disopyramide (10  $\mu$ M). n, number of cells. The statistical significance was examined by paired t-test.

**Figure S4. Effects of disopyramide on L-type calcium channel currents in hiPSC-CMs from the healthy donor.** The L-type Ca channel currents ( $I_{Ca-L}$ ) were evoked by the protocol indicated in A. (A) The representative traces of  $I_{Ca-L}$  at 0 mV in absence (Ctr) and presence of disopyramide (10  $\mu$ M). (B) Current-voltage relationship (I-V) curves of  $I_{Ca-L}$  in absence (Ctr) and presence of disopyramide (10  $\mu$ M). (C) Mean values of  $I_{Ca-L}$  at 0 mV in absence (Ctr) and presence of disopyramide (10  $\mu$ M). shown are mean  $\pm$  SEM, n represents number of cells. The statistical significance was examined by paired t-test.

**Figure S5. Effects disopyramide on Na/Ca exchanger currents in hiPSC-CMs from the healthy donor.** The Na/Ca exchanger currents ( $I_{NCX}$ ) were evoked by the protocol indicated in A (inset).  $I_{NCX}$  was analyzed as NiCL<sub>2</sub> (5mM) sensitive currents. (A) Representative traces of  $I_{NCX}$  in absence (Ctr) and presence of disopyramide (10  $\mu$ M). (B) Mean values of  $I_{NCX}$  at +60 mV in absence (Ctr) and presence of disopyramide. (C) Mean values of  $I_{NCX}$  at -100 mV in absence (Ctr) and presence of disopyramide. n, number of cells. The statistical significance was examined by paired t-test.

**Figure S6. Effects disopyramide on peak and late Na channel currents in hiPSC-CMs from the healthy donor.** Peak and late Na channel currents ( $I_{Na}$ ) were evoked by the protocol indicated in A (inset). Late  $I_{Na}$  was measured at 300 ms after initiation of the depolarization pulse. TTX (30 $\mu$ M) sensitive currents were analyzed as late  $I_{Na}$ . (A) Representative traces of  $I_{Na}$  in absence (Ctr) and presence of disopyramide (10  $\mu$ M). (B) I-V curves of peak  $I_{Na}$  in absence (Ctr) and presence of disopyramide (10  $\mu$ M).

(C) Mean values of peak  $I_{Na}$  at -40 mV in absence (Ctr) and presence of disopyramide.

(D) Mean values of late  $I_{Na}$  at -40 mV in absence (Ctr) and presence of disopyramide.

n, number of cells. The statistical significance was examined by paired t-test.

Figures

Figure S1

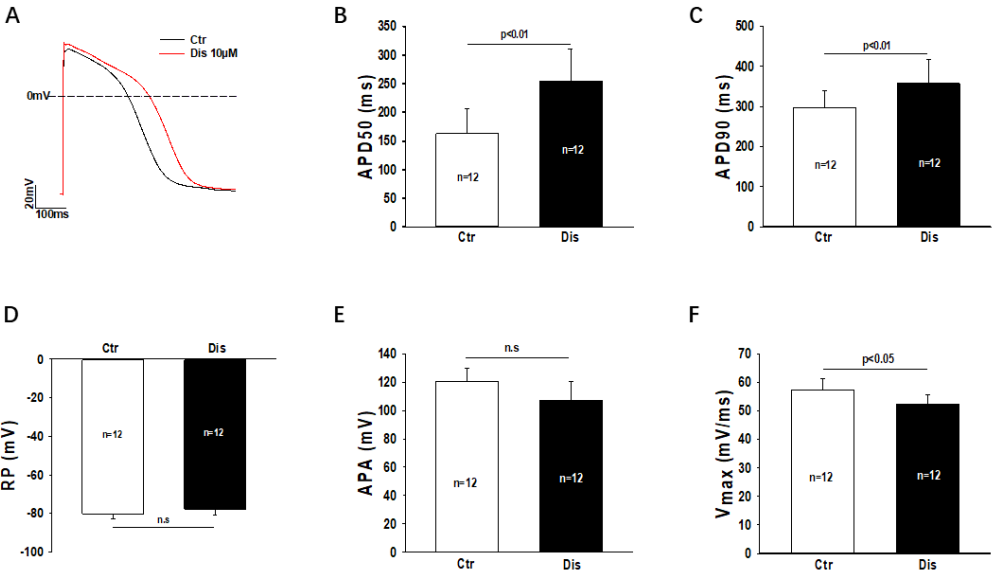

Figure S2

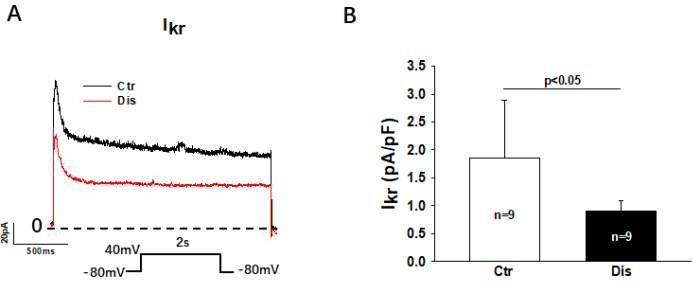

Figure S3

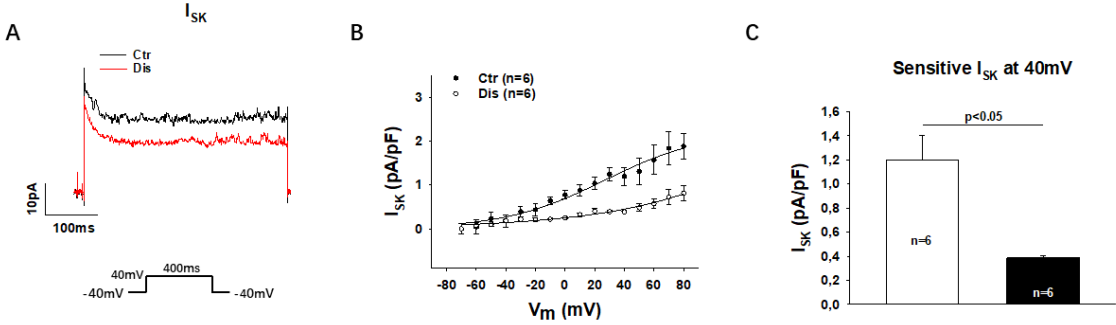



Figure S4

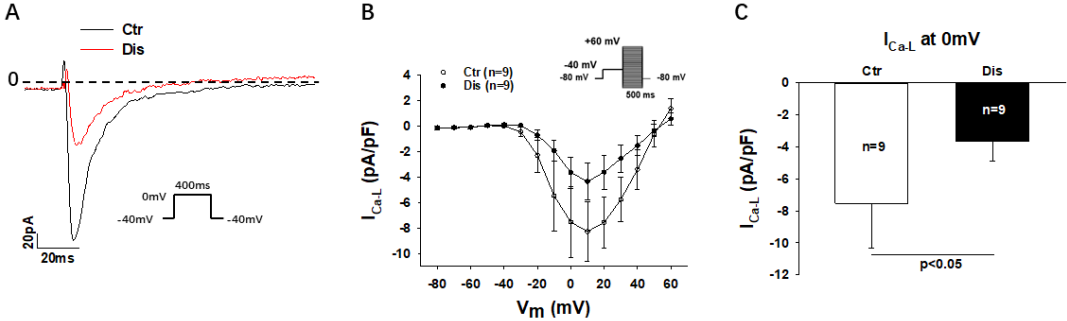

Figure S5

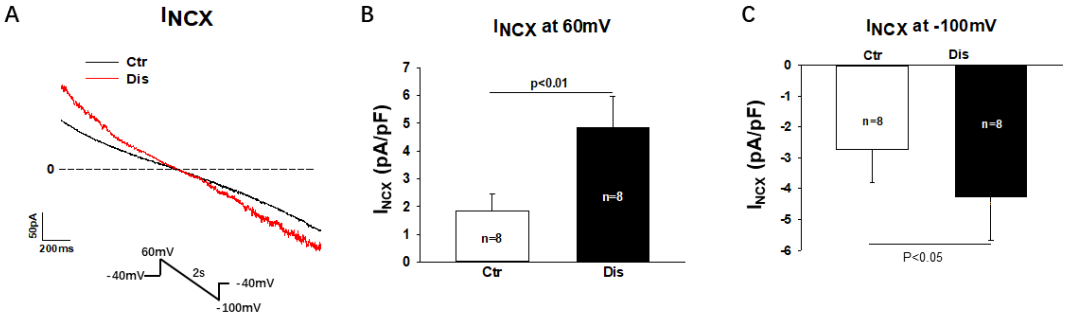

Figure S6

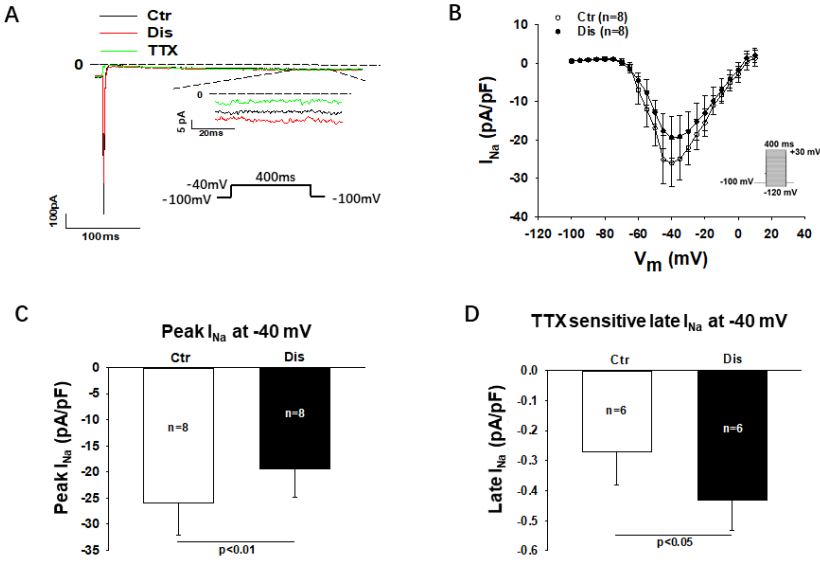

Supplement: DataSheet_1.pdf [file DataSheet_1.pdf]
